# Supplementary material for: Genotype‐Positive Status Is Associated With Poor Prognoses in Patients With Left Ventricular Noncompaction Cardiomyopathy
Source: PubMed Central journal article supplement — J Am Heart Assoc. 2018 Oct 10;7(20):e009910. doi: 10.1161/JAHA.118.009910 (PMC6474962; doi:10.1161/jaha.118.009910), 2018-10-10
Supplement: JAH3-7-e009910-s001.pdf [file JAH3-7-e009910-s001.pdf]

# **SUPPLEMENTAL MATERIAL**

## **Data S1.**

### Gene panel

We designed a panel of 72 gene which have been implicated in LVNC, other cardiomyopathies or ion channel disease. The panel consists of the following genes: *ABCC9, ACTC1, ACTN2, BAG3, CALR3, CASQ2, CAV3, CFL1, CFL2, CMYA5, CRIP2, CRYAB, DES, DMD, DMPK, DSC2, DSG2, DSP, DTNA, FHL1, FHL2, FLNC, GPD1L, HCN4, JPH2, JUP, KCNE1, KCNE2, KCNE3, KCNH2, KCNJ2, KCNQ1, LAMP2, LDB3, LMNA, MIB1, MYBPC3, MYH6, MYH7, MYL2, MYLK3, MYOM1, MYOM2, MYOZ1, MYOZ2, MYPN, NEXN, NNT, OBSCN, PDLIM3, PKP2, PLEC, PLN, PRDM16, PRKAG2, RBM20, RYR2, SCN5A, SGCD, SGCG, SLC25A4, SNTA1, TAZ, TCAP, TMEM43, TNNC1, TNNI3, TNNT2, TPM1, TTN, TTR, VCL.*

Table S1. Criteria for classifying pathogenic variants according to ACMG guideline

| Evidence of pathogenicity | Category |                                                                                                                                                                                           |
|---------------------------|----------|-------------------------------------------------------------------------------------------------------------------------------------------------------------------------------------------|
| Very strong               | PVS1     | null variant (nonsense, frameshift, canonical $\pm 1$ or 2 splice sites, initiation codon, single or multiexon deletion) in a gene where loss-of-function is a known mechanism of disease |
| Strong                    | PS1      | Same amino acid change as a previously established pathogenic variant regardless of nucleotide change                                                                                     |
|                           | PS2      | De novo (both maternity and paternity confirmed) in a patient with the disease and no family history                                                                                      |
|                           | PS3      | Well-established in vitro or in vivo functional studies supportive of a damaging effect on the gene or gene product                                                                       |
|                           | PS4      | The prevalence of the variant in affected individuals is significantly increased compared with the prevalence in controls                                                                 |
| Moderate                  | PM1      | Located in a mutational hot spot and/or critical and well-established functional domain without benign variation                                                                          |
|                           | PM2      | Absent from controls (or at extremely low frequency if recessive) in Exome Sequencing Project, 1000 Genomes Project, or Exome Aggregation Consortium                                      |
|                           | PM3      | For recessive disorders, detected in trans with a pathogenic variant                                                                                                                      |
|                           | PM4      | Protein length changes as a result of in-frame deletions/insertions in a nonrepeat region or stop-loss variants                                                                           |
|                           | PM5      | Novel missense change at an amino acid residue where a different missense change determined to be pathogenic has been seen before                                                         |
|                           | PM6      | Assumed de novo, but without confirmation of paternity and maternity                                                                                                                      |
| Supporting                | PP1      | Cosegregation with disease in multiple affected family members in a gene definitively known to cause the disease                                                                          |
|                           | PP2      | Missense variant in a gene that has a low rate of benign missense variation and in which missense variants are a common mechanism of disease                                              |
|                           | PP3      | Multiple lines of computational evidence support a deleterious effect on the gene or gene product                                                                                         |
|                           | PP4      | Patient's phenotype or family history is highly specific for a disease with a single genetic etiology                                                                                     |
|                           | PP5      | Reputable source recently reports variant as pathogenic, but the evidence is not available to the laboratory to perform an independent evaluation                                         |

Adapted by permission from Springer Nature: *Genetics in Medicine*<sup>18</sup> Standards and guidelines for the interpretation of sequence variants: a joint consensus recommendation of the American College of Medical Genetics and Genomics and the Association for Molecular Pathology. Richards et al. Copyright ©2015.

PVS, very strong; PS, strong; PM, moderate; PP, supporting.

Table S2. Rules for combining criteria for pathogenic and likely pathogenic variants

|                   |                                                                                                                                                                                                       |
|-------------------|-------------------------------------------------------------------------------------------------------------------------------------------------------------------------------------------------------|
| Pathogenic        | (i) 1 Very strong (PVS1) AND<br>(a) $\geq 1$ Strong (PS1–PS4) OR<br>(b) $\geq 2$ Moderate (PM1–PM6) OR<br>(c) 1 Moderate (PM1–PM6) and 1 supporting (PP1–PP5) OR<br>(d) $\geq 2$ Supporting (PP1–PP5) |
|                   | (ii) $\geq 2$ Strong (PS1–PS4)                                                                                                                                                                        |
|                   | (iii) 1 Strong (PS1–PS4) AND<br>(a) $\geq 3$ Moderate (PM1–PM6) OR<br>(b) 2 Moderate (PM1–PM6) AND $\geq 2$ Supporting (PP1–PP5) OR<br>(c) 1 Moderate (PM1–PM6) AND $\geq 4$ supporting (PP1–PP5)     |
| Likely pathogenic | (i) 1 Very strong (PVS1) AND 1 moderate (PM1–PM6)                                                                                                                                                     |
|                   | (ii) 1 Strong (PS1–PS4) AND 1–2 moderate (PM1–PM6)                                                                                                                                                    |
|                   | (iii) 1 Strong (PS1–PS4) AND $\geq 2$ supporting (PP1–PP5)                                                                                                                                            |
|                   | (iv) $\geq 3$ Moderate (PM1–PM6)                                                                                                                                                                      |
|                   | (v) 2 Moderate (PM1–PM6) AND $\geq 2$ supporting (PP1–PP5)                                                                                                                                            |
|                   | (vi) 1 Moderate (PM1–PM6) AND $\geq 4$ supporting (PP1–PP5)                                                                                                                                           |

Adapted by permission from Springer Nature: Genetics in Medicine 18 Standards and guidelines for the interpretation of sequence variants: a joint consensus recommendation of the American College of Medical Genetics and Genomics and the Association for Molecular Pathology. Richards et al. Copyright ©2015.

PVS, very strong; PS, strong; PM, moderate; PP, supporting.

Table S3. Primers used for Sanger sequencing confirmation

|          | Forward primer         | Reverse primer         |
|----------|------------------------|------------------------|
| ACTC1-1  | ACTTAATTGATTTCTTACCGT  | GTGTCAACTCAGGGTTAAATG  |
| ACTC1-2  | TACGGCCAGAAGCATAACAGGG | CTTGACTTGGGCAGTTAGATA  |
| DMD      | ATATTATGGGGTTATTA      | CGAGCAGGGTCCAATTGTATC  |
| DSC2     | GCAACCTTGCATCTAGCCATA  | GGCCTCATTTC AACATTGTTC |
| DSP-1    | CCCGGACCTGCGCTACGAGGT  | CGGGAAGTTCTTTCGGGACCT  |
| DSP-2    | CATAGATTTGCAACCTTGCCA  | CTGGAGCCCCTTCAGGTATGC  |
| DSP-3    | ACAGAACGCTCCCGATATCAG  | GCAGATGCTCCAGCGATAGAT  |
| LAMP2-1  | GCCATTACGAGCTTGTTATGC  | GAGGGACACAGCAATATCAA   |
| LAMP2-2  | TGTTCCGGTTGCAGAGTATAT  | TATGCCCTTTAAAATGATAAT  |
| LMNA     | CCGAGATCGCGCCACTACT    | AAACAAACAGAAGCGCCACAA  |
| MYBPC3-1 | ATGTGCAGCACCTCAACTGGC  | ACCTCCAGTGGGGGGCTCTGC  |
| MYBPC3-2 | CAGGATCCATTCGGCATTATA  | GCTAACAGGATCCCGAAACTC  |
| MYBPC3-3 | CTGGAATGGGAGTGGGTTCAA  | GGATTACAGGCGTCTGGCCTT  |
| MYBPC3-4 | ACATTATATTCTTTCGAGGAG  | TGGTGCTCAGGCAATTATGTA  |
| MYH7-2   | GGGTCCCAACTCACATCGAAG  | AGTGGGCAATGAGTACGTCAC  |
| MYH7-3   | TCTCTGTCCACCCAGGTGTAC  | GGAAGGGACTCACTGGTAACT  |
| MYH7-4   | GAGAAAGACACCTAGCCATG   | GACCGTCCGGAACGACA ACTC |
| MYH7-5   | GAGGAGGAATAGCAGTTGAAG  | GACCAAGAACCCACCAATTCC  |
| MYH7-6   | GAGCAAGGTCAGCAAGGGTCC  | CTCTTGCTGGGCTCCTTAATG  |
| KCNE1-1  | TCATGGGGAAGGCTTCGTCTC  | AGCAGGGTGGCAACATGTCGG  |
| KCNE1-2  | GTGTGTTGGGTTGTTCTATGG  | AGCTGCAGCAGTGGAACCTTA  |

|        |                       |                       |
|--------|-----------------------|-----------------------|
| NNT    | AGAGAATGCTGGACATGTTCA | AAGAGAATGCTCAGTTTGACC |
| SCN5A  | CCTGCCTCAGCCTTCCGAGTA | CCCCACTCCCTACAAGCTTTA |
| TNNT2  | TTCCCAGTAATTATATCACAT | TGTCCTGACTTCTAACACCGT |
| TPM1   | AGTCACAGGGGCAGGACTGAT | CCCCCACCAGCAATATTAGA  |
| TTN-1  | GGCGTTCCACTTGTAGGTGA  | GAGACTCCTGGAAAGGCCAC  |
| TTN-2  | GTTACTGGACCTGGCCTTCC  | CCTGCTCCACCTAGGAGACT  |
| TTN-3  | ATTAACGGCCACAGACCGAG  | GTGAACCAGTCCCTGCAAGA  |
| TTN-4  | AGGAGGTTGTGGCACTTCTG  | TGTGAGAGTTCTGGACACGC  |
| TTN-5  | TGGAAGGGGTTTGCCAAGAA  | CCAAGCCTACCATCAGAGCC  |
| TTN-6  | AAGGCAAGCTTGGTTCTCCA  | AAAATAGGCACAGGGCCTCC  |
| TTN-7  | AGGTTTTTCAGGCTCACCTGG | GGTCCGAGAAAAGAGGGTGG  |
| TTN-8  | AGGTTTTTCAGGCTCACCTGG | GCACAGCACAATGGAACAGG  |
| TTN-9  | TACCGGCTGCATTGGAAACT  | TTGAAAAGATCCCCCAGGGC  |
| TTN-10 | TGAAGGCTTGCTGACTCCTG  | GTATTGGCCCACCTGTGGAA  |
| TTN-11 | TTTCAACAGGAGGGCCACAG  | GGGGAGCTGGATAAAGACCG  |
| TTN-12 | AGACTGGGCCAAACATACCA  | GAACCAGTTCAGGCCTCTCC  |
| TTN-13 | TGACAAAGGAGATGAGGTTGC | CTGCAGAGCCAGAAGTTCCA  |
| TTN-14 | CCAACAGGGCAGTAAGGGAA  | AAGGGGTTGCTTCAGCTGTT  |
| TTN-15 | AGCATCTGAGGGGGAGATGT  | TTGGATCCCAGGTTCCCCTA  |

Table S4. Pathogenic and likely pathogenic variants detected in the cohort.

| Gene         | dbSNP       | Variant type         | Transcript   | Transcript effect | Protein effect | Novel variant | Pathogenicity* | Evidence†           | gnomAD_ALL‡ | gnomAD_EAS§ | Carriers ID   |
|--------------|-------------|----------------------|--------------|-------------------|----------------|---------------|----------------|---------------------|-------------|-------------|---------------|
| <i>ACTC1</i> | rs193922680 | missense             | NM_005159    | c.G301A           | p.E101K        |               | P              | PS1,PS3,PM2,PP5     | 0.00000406  | NA          | 90            |
|              | rs730880410 | missense             | NM_005159    | c.T986C           | p.I329T        |               | LP             | PS3,PM2             | NA          | NA          | 60            |
| <i>DMD</i>   |             | stop-gain            | NM_000109    | c.G7875A          | p.W2625X       | Novel         | LP             | PS3,PM2             | NA          | NA          | 43            |
|              |             | splicing             | NM_000109    | c.A3579+3T        |                |               | LP             | PS3,PM2             | NA          | NA          | 38            |
| <i>DSC2</i>  | rs193922708 | missense             | NM_004949    | c.C835T           | p.R279C        |               | P              | PS1,PS3             | 0.00004469  | NA          | 9             |
| <i>DSP</i>   |             | frameshift insertion | NM_001008844 | c.1_2insC         | p.M1fs         | Novel         | LP             | PVS1,PM2            | NA          | NA          | 72;99;114;115 |
|              |             | stop-gain            | NM_001008844 | c.C1138T          | p.Q380X        | Novel         | LP             | PVS1,PM2            | NA          | NA          | 66            |
|              |             | stop-gain            | NM_001008844 | c.G3901T          | p.E1301X       | Novel         | LP             | PVS1,PM2            | NA          | NA          | 70            |
| <i>KCNE1</i> | rs79654911  | missense             | NM_000219    | c.G200A           | p.R67H         |               | P              | PS1,PS3,PM2,PP3,PP5 | 0.00005774  | 0.00005299  | 80            |
| <i>LAMP2</i> |             | frameshift deletion  | NM_001122606 | c.371_375del      | p.T124fs       | Novel         | LP             | PVS1,PM2            | NA          | NA          | 13            |



|                    |             |                     |              |                |          |       |    |                     |            |            |     |
|--------------------|-------------|---------------------|--------------|----------------|----------|-------|----|---------------------|------------|------------|-----|
|                    |             | frameshift deletion | NM_001122606 | c.325delT      | p.Y109fs | Novel | LP | PVS1,P<br>M2        | NA         | NA         | 17  |
| <b>LMNA</b>        |             | missense            | NM_001257374 | c.T998A        | p.V333E  |       | LP | PS3,PM2<br>,PM5     | NA         | NA         | 40  |
| <b>MYBP<br/>C3</b> | rs786204339 | frameshift deletion | NM_000256    | c.1377delC     | p.P459fs | Novel | LP | PVS1,P<br>M2        | NA         | NA         | 86  |
|                    |             | frameshift deletion | NM_000256    | c.1352_1379del | p.E451fs | Novel | LP | PVS1,P<br>M2        | NA         | NA         | 104 |
|                    |             | frameshift deletion | NM_000256    | c.2568delG     | p.R856fs | Novel | LP | PVS1,P<br>M2        | NA         | NA         | 114 |
|                    | rs397515887 | missense            | NM_000256    | c.C1112T       | p.P371L  |       | LP | PS3,PM2             | 0.00002466 | NA         | 43  |
| <b>MYH7</b>        | rs121913637 | missense            | NM_000257    | c.C2155T       | p.R719W  |       | P  | PS1,PS3,<br>PM2,PP5 | 0.00003231 | NA         | 105 |
|                    | rs3218713   | missense            | NM_000257    | c.G746A        | p.R249Q  |       | P  | PS1,PS3,<br>PM2,PP5 | NA         | NA         | 112 |
|                    | rs730880161 | missense            | NM_000257    | c.G2785A       | p.E929K  |       | P  | PS1,PS3,<br>PM2     | NA         | NA         | 48  |
|                    | rs397516089 | missense            | NM_000257    | c.G1106A       | p.R369Q  |       | P  | PS1,PS3,<br>PM2,PP5 | NA         | NA         | 64  |
|                    | rs730880852 | missense            | NM_000257    | c.C745G        | p.R249G  |       | P  | PS1,PS3,<br>PM2,PP5 | NA         | NA         | 51  |
| <b>NEXN</b>        | rs756273801 | missense            | NM_001172309 | c.T488C        | p.L163S  |       | P  | PS1,PS3             | 0.00001626 | 0.00017399 | 61  |

|                     |             |                      |              |                      |                |       |    |                             |                |                |     |
|---------------------|-------------|----------------------|--------------|----------------------|----------------|-------|----|-----------------------------|----------------|----------------|-----|
| <b><i>NNT</i></b>   |             | frameshift insertion | NM_012343    | c.1770dupC           | p.D590fs       | Novel | LP | PVS1,P<br>M2                | NA             | NA             | 105 |
| <b><i>SCN5A</i></b> | rs45546039  | missense             | NM_000335    | c.G665A              | p.R222Q        |       | P  | PS1,PS3,<br>PM2,PP3<br>,PP5 | NA             | NA             | 72  |
|                     | rs199473054 | missense             | NM_000335    | c.G283A              | p.V95I         |       | P  | PS1,PS3,<br>PP3,PP5         | 0.0000288<br>6 | 0.000158<br>98 | 27  |
| <b><i>TNNT2</i></b> | rs121964856 | missense             | NM_000364    | c.G305A              | p.R102Q        |       | P  | PS1,PS3,<br>PM2,PP3<br>,PP5 | NA             | NA             | 9   |
| <b><i>TPM1</i></b>  | rs397516387 | missense             | NM_000366    | c.C725T              | p.A242V        |       | LP | PS3,PM2                     | 0.0000040<br>6 | NA             | 41  |
| <b><i>TTN</i></b>   |             | frameshift insertion | NM_001256850 | c.55176dup<br>A      | p.E18393f<br>s | Novel | LP | PVS1,P<br>M2                | NA             | NA             | 79  |
|                     |             | frameshift deletion  | NM_001256850 | c.50906_50<br>907del | p.P16969f<br>s | Novel | LP | PVS1,P<br>M2                | NA             | NA             | 81  |
|                     |             | frameshift deletion  | NM_001256850 | c.8228delA           | p.N2743fs      | Novel | LP | PVS1,P<br>M2                | NA             | NA             | 86  |
|                     |             | splicing             | NM_001256850 | c.G13141+1<br>A      |                | Novel | LP | PVS1,P<br>M2                | NA             | NA             | 92  |
|                     |             | stop-gain            | NM_001256850 | c.C72093G            | p.Y24031<br>X  | Novel | LP | PVS1,P<br>M2                | NA             | NA             | 93  |
|                     |             | stop-gain            | NM_001256850 | c.C56939A            | p.S18980<br>X  | Novel | LP | PVS1,P<br>M2                | NA             | NA             | 100 |

|             |                      |              |                      |            |       |    |              |    |    |     |
|-------------|----------------------|--------------|----------------------|------------|-------|----|--------------|----|----|-----|
|             | frameshift deletion  | NM_001256850 | c.98135delA          | p.H32712fs | Novel | LP | PVS1,P<br>M2 | NA | NA | 102 |
|             | splicing             | NM_001256850 | c.40222+2insAATA     |            | Novel | LP | PVS1,P<br>M2 | NA | NA | 104 |
|             | stop-gain            | NM_001256850 | c.C80167T            | p.R26723X  | Novel | LP | PVS1,P<br>M2 | NA | NA | 116 |
|             | frameshift deletion  | NM_001256850 | c.58109delT          | p.V19370fs | Novel | LP | PVS1,P<br>M2 | NA | NA | 117 |
|             | stop-gain            | NM_001256850 | c.C44607A            | p.Y14869X  | Novel | LP | PVS1,P<br>M2 | NA | NA | 120 |
|             | stop-gain            | NM_001256850 | c.A88642T            | p.K29548X  | Novel | LP | PVS1,P<br>M2 | NA | NA | 45  |
| rs779485172 | splicing             | NM_001256850 | c.A63605-2T          | .          | Novel | LP | PVS1,P<br>M2 | NA | NA | 29  |
|             | frameshift deletion  | NM_001256850 | c.56615_56618del     | p.E18872fs | Novel | LP | PVS1,P<br>M2 | NA | NA | 73  |
|             | frameshift insertion | NM_001256850 | c.48473_48474insGCTT | p.F16158fs | Novel | LP | PVS1,P<br>M2 | NA | NA | 34  |

\* Determined according to criteria in Table S2

† As listed in Table S1

‡ Minor allele frequencies of variants among total population in the Genome Aggregation Database (*Nature*. 2016;536: 285-91)

§ Minor allele frequencies of variants among East Asians in the Genome Aggregation Database (*Nature*. 2016;536: 285-91)

LP, likely pathogenic; NA, not available; P, pathogenic

Table S5. Clinical characteristics of the six carriers of *DSP* variant

| Patient ID | Age at onset | Sex    | NYHA class | Arrhythmia | Enlarged RV | Antiarrhythmics | Other treatment | Outcome          |
|------------|--------------|--------|------------|------------|-------------|-----------------|-----------------|------------------|
| 66         | 20           | Male   | III        | SUVT       | No          | Amiodarone      |                 | HT               |
| 70         | 44           | Male   | II         | SUVT       | No          |                 | RFCA            |                  |
| 72         | 17           | Male   | II         | NSVT       | No          | Amiodarone      | ICD             |                  |
| 99         | 40           | Male   | II         | SUVT, AF   | No          | Amiodarone      |                 |                  |
| 114        | 60           | Male   | III        | SUVT       | No          | Amiodarone      |                 | HF-related death |
| 115        | 51           | Female | II         | SUVT       | No          | Amiodarone      | ICD             |                  |

AF, atrial fibrillation; HF, heart failure; HT, heart transplantation; ICD, implantable cardioverter defibrillator; NYHA, New York Heart Association; NSVT, non-sustained ventricular tachycardia; RFCA, radiofrequency catheter ablation; RV, right ventricle; SUVT, sustained ventricular tachycardia.

Table S6. Characteristics of child patients who reached the primary endpoint.

| Patient ID | Sex  | Age at onset | NYHA functional class | Family history | Outcome               | Pathogenic variants |
|------------|------|--------------|-----------------------|----------------|-----------------------|---------------------|
| 10         | Male | 16           | I/II                  | No             | SCD                   |                     |
| 13         | Male | 16           | III/IV                | No             | HF-related death      | LAMP2 p.T124fs      |
| 64         | Male | 3            | III/IV                | No             | Heart transplantation | MYH7 p.R369Q        |
| 84         | Male | 8            | I/II                  | No             | SCD                   |                     |

HF indicates heart failure; NYHA, New York Heart Association; SCD, sudden cardiac death.

Table S7. Incidence of primary and secondary endpoints in child and adult patients.

| Endpoints                              | Children (n=17) | Adult (n=83) | <i>P</i> -Value |
|----------------------------------------|-----------------|--------------|-----------------|
| Death and heart transplantation, n (%) | 4 (23.5)        | 28 (33.7)    | 0.411           |
| All-cause death, n (%)                 | 3 (17.6)        | 24 (28.9)    | 0.549           |
| Sudden cardiac death, n (%)            | 2 (11.8)        | 4 (4.8)      | 0.269           |
| Heart failure-related death, n (%)     | 1 (5.9)         | 19 (16.6)    | 0.182           |
| Cardiovascular death, n (%)            | 3 (17.6)        | 24 (28.9)    | 0.549           |
| Heart transplantation, n (%)           | 1 (5.9)         | 4 (4.8)      | 1.000           |

Table S8. Characteristics of adult patients who reached the primary endpoint.

| Patient ID | Sex    | Age at onset | NYHA functional class | Family history | Outcome               | Pathogenic variants         |
|------------|--------|--------------|-----------------------|----------------|-----------------------|-----------------------------|
| 14         | Male   | 42           | III/IV                | No             | HF-related death      |                             |
| 15         | Female | 39           | III/IV                | No             | HF-related death      |                             |
| 17         | Female | 19           | III/IV                | Yes            | HF-related death      | LAMP2 p.Y109fs              |
| 18         | Male   | 44           | III/IV                | No             | HF-related death      |                             |
| 19         | Male   | 43           | III/IV                | No             | HF-related death      |                             |
| 22         | Female | 70           | III/IV                | No             | HF-related death      |                             |
| 27         | Male   | 50           | III/IV                | No             | HF-related death      | SCN5A p.V95I                |
| 32         | Male   | 52           | III/IV                | No             | HF-related death      |                             |
| 34         | Male   | 18           | III/IV                | No             | HF-related death      | TTN p.F16158fs              |
| 41         | Male   | 44           | III/IV                | Yes            | HF-related death      | TPM1 p.A242V                |
| 43         | Male   | 59           | III/IV                | No             | HF-related death      | DMD p.W2625X;MYBPC3 p.P371L |
| 45         | Male   | 39           | III/IV                | No             | HF-related death      | TTN p.K29548X               |
| 51         | Female | 31           | III/IV                | Yes            | HF-related death      | MYH7 p.R249G                |
| 55         | Female | 26           | III/IV                | No             | HF-related death      |                             |
| 57         | Male   | 34           | I/II                  | No             | SCD                   |                             |
| 61         | Male   | 39           | I/II                  | Yes            | SCD                   | NEXN p.L163S                |
| 66         | Male   | 20           | III/IV                | No             | Heart transplantation | DSP p.Q380X                 |
| 67         | Male   | 37           | III/IV                | No             | HF-related death      |                             |
| 68         | Female | 52           | I/II                  | No             | SCD                   |                             |

|     |        |    |        |    |                            |                              |
|-----|--------|----|--------|----|----------------------------|------------------------------|
| 73  | Male   | 78 | I/II   | No | HF-related death           | TTN p.E18872fs; TTN p.G4397D |
| 77  | Male   | 66 | I/II   | No | Other cardiovascular death |                              |
| 80  | Male   | 40 | III/IV | No | Heart transplantation      | KCNE1 p.R67H                 |
| 93  | Male   | 28 | I/II   | No | Heart transplantation      | TTN p.Y24031X                |
| 99  | Male   | 40 | I/II   | No | HF-related death           | DSP p.M1fs                   |
| 102 | Male   | 23 | III/IV | No | Heart transplantation      | TTN p.H32712fs               |
| 105 | Female | 46 | I/II   | No | HF-related death           | MYH7 p.R719W; NNT p.D590fs   |
| 110 | Female | 41 | III/IV | No | SCD                        |                              |
| 114 | Male   | 60 | III/IV | No | HF-related death           | DSP p.M1fs; MYBPC3 p.R856fs  |

HF indicates heart failure; NYHA, New York Heart Association; SCD, sudden cardiac death.
